# Supplementary material for: Pyrrolic nitrogen-doped carbon nanotubes: physicochemical properties, interactions with Pd and their role in the selective hydrogenation of nitrobenzophenone
Source: Royal Society of Chemistry journal article supplement (doi:10.1039/c4ra12523a), 2014-11-24
Supplement: c4ra12523a1.pdf [file c4ra12523a1.pdf]

**Pyrrolic nitrogen-doped carbon nanotubes: Physicochemical properties, interactions with Pd and their role in the selective hydrogenation of nitrobenzophenone**

Lucy M. Ombaka, Patrick G. Ndungu and Vincent O. Nyamori\*

School of Chemistry and Physics, University of KwaZulu-Natal, Westville Campus, Private Bag X54001, Durban, 4000, South Africa

**Supplementary Information S1**

**Materials used to synthesize 3-ferrocenyl-2-(4-cyanophenyl)acrylonitrile and the synthetic procedure**

Ferrocenecarboxaldehyde 98%, 4-cyanophenylacetonitrile 97%, piperidine 99%, diethyl ether 99.8% and hexane 97% were purchased from Sigma Aldrich. All reagents and solvents were of analytical grade and were used as received from the suppliers. Aluminium-backed silica gel 60 F<sub>254</sub> plates purchased from Merck were used to carry out thin layer chromatography in solvents of varying polarity. Column chromatography was accomplished by using Merck silica gel 60, 0.063-0.2 mm.

The catalyst, 3-ferrocenyl-2-(4-cyanophenyl)acrylonitrile, was synthesized *via* a mechanochemical approach under solvent-free conditions following the procedure outlined by Imrie *et al.* Ferrocenecarboxaldehyde (200.0 mg, 0.93 mmol) and 4-cyanophenylacetonitrile (132.0 mg, 0.93 mmol) were ground together in the presence of 2 drops of piperidine to yield a maroon paste. The paste was first dried in air, then under vacuum to obtain a maroon product. The maroon product was purified by means of column chromatography on silica gel with a solvent system of (1:1) hexane/diethyl ether to obtain 3-ferrocenyl-2-(4-cyanophenyl)acrylonitrile as dark red crystals. Yield (311.0 mg; yield of 98%); m. p. 139 °C (lit [Imrie *et al.*]: 140 °C). IR (cm<sup>-1</sup>) 3099, 3050, 2943, 2225, 2207, 1609, 1585, 1452, 1408, 1367, 1312, 1252, 1178, 1103, 1032, 998, 920, 833, 826, 543, 501, 487, 432; <sup>1</sup>H-NMR (ppm) in CDCl<sub>3</sub>: 7.68 (4H, s, ArH), 7.50 (1H, s, CH), 4.99 (2H, t, *J* 1.9, C<sub>5</sub>H<sub>4</sub>), 4.61 (2H, t, *J* 1.8, C<sub>5</sub>H<sub>4</sub>), 4.24 (5H, s, C<sub>5</sub>H<sub>5</sub>); <sup>13</sup>C-NMR (ppm) in CDCl<sub>3</sub> 132.85, 125.45, 146.60, 139.12, 118.56, 118.34, 111.36, 104.52, 77.18, 72.56, 70.68, 70.10. MS (C<sub>20</sub>H<sub>14</sub>FeN<sub>2</sub>) ES: [M]<sup>+</sup> *m/z* calcd 338.050638, found 338.0500.

### **Conditions for GC-FID and GC-MS analysis**

Quantitative analysis of 4-nitrobenzophenone (NBP) and 4-aminobenzophenone (ABP) was conducted on the GC-FID. The GC-FID was fitted with a SGE BP X5 column (0.25 mm inner diameter, 30 m length, 0.25  $\mu\text{M}$  film thickness). The carrier gas used was nitrogen and it was pumped at a flow rate of 30.0 mL min<sup>-1</sup>. The oven temperature used for NBP and ABP analysis was 250 °C. A splitless injection mode was used, and for each analysis 3  $\mu\text{L}$  of the quenched product was injected at a temperature of 110 °C. The identities of NBP and ABP were determined by comparing their retention times with that of purchased commercial samples used as external standards. The integrated peak areas of each sample was used to determine the concentration of NBP and ABP at different time intervals. The calibration range used for both NBP and ABP was 5, 20, 40, 80 and 100 ppm. The NBP calibration curve had an R<sup>2</sup> value of 0.9884, while the ABP calibration curve had an R<sup>2</sup> value of 0.9981.

Further qualitative analysis of the hydrogenation product was conducted on the GC-MS. The GC-MS was fitted with an InertCap 5MS/Sil column (0.25 mm inner diameter, 30 m length, 0.25  $\mu\text{M}$  film thicknesses). The carrier gas used was helium and it was pumped at a flow rate of 30.0 mL min<sup>-1</sup>. The oven temperature used for NBP and ABP analysis was 250 °C. A splitless injection mode was used, for each analysis, 1  $\mu\text{L}$  of the quenched product was injected at a temperature of 110 °C. The identity of NBP and ABP was determined by comparing their masses with the hit-targets obtained from the mass spectrometer library.

## ICP-OES analysis

Triplicate analyses were performed for each catalyst. For all analyses, an external standard was used to create a calibration line ( $R^2 = 0.994$ ). The calibration standards used were prepared in nitric acid solutions at concentrations of 0, 20, 40, 60 and 100 ppm from a palladium ICP-OES standard stock solution (Johnson Matthey, prepared in South Africa, guaranteed to be 1000 ppm  $\pm$  0.2% Pd in 0.5 M HNO<sub>3</sub>). For each ICP-OES measurements, three measurements were conducted. The results were analysed using a Perkin Elmer WinLab 32 software.

## Raman analysis

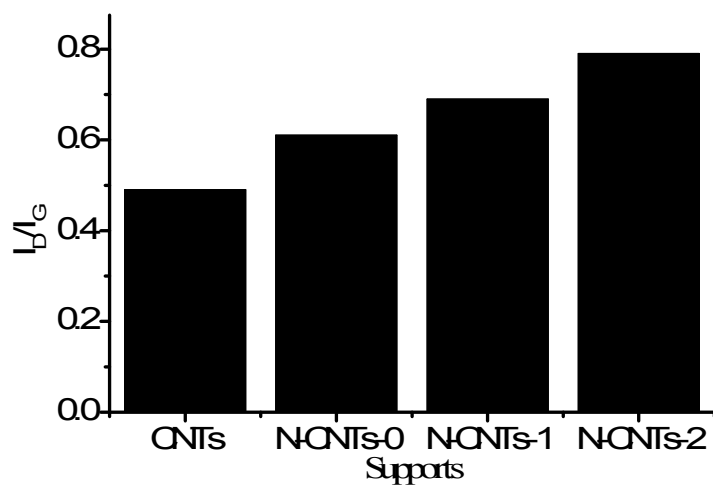

Figure S1:  $I_D/I_G$  ratios of N-CNTs and CNTs: Note the higher ratios indicate more disordered materials

## Supplementary Information S2

Table S2. Summary of oxygen and nitrogen percentages in acetonitrile solution used to synthesize N-CNTs.

| Sample   | Mass of ethylbenzoate (g) in 10 g of solution | Moles of oxygen in 10 g of solution | Oxygen (%) in acetonitrile solution | Moles of nitrogen in 10 g of solution | nitrogen (%) in acetonitrile solution |
|----------|-----------------------------------------------|-------------------------------------|-------------------------------------|---------------------------------------|---------------------------------------|
| N-CNTs-0 | 0                                             | 0                                   | 0                                   | 0.239                                 | 33.5                                  |
| N-CNTs-1 | 0.50                                          | 0.009                               | 1                                   | 0.226                                 | 31.7                                  |
| N-CNTs-2 | 1.00                                          | 0.018                               | 2                                   | 0.211                                 | 29.6                                  |

### Supplementary Information S3

**S3 (1). Summary of XPS analysis of all Pd/CNTs and Pd/N-CNTS**

| Sample      | Element | Atomic Concentration (%) | Binding energy (eV)                                |
|-------------|---------|--------------------------|----------------------------------------------------|
| Pd/N-CNTs-0 | O       | 10.48                    | 532                                                |
|             | N       | 4.36                     | 398.5 (21.43%)<br>400.3 (63.08%)<br>404.1 (15.49%) |
|             | Pd      | 1.31                     | 335                                                |
|             | C       | 83.85                    | 284                                                |
| Pd/N-CNTs-1 | O       | 8.34                     | 532                                                |
|             | N       | 3.48                     | 398.4 (16.68%)<br>400.6 (72.87%)<br>404.7 (10.46%) |
|             | Pd      | 0.67                     | 336                                                |
|             | C       | 87.51                    | 284                                                |
| Pd/N-CNTs-2 | O       | 13.46                    | 534                                                |
|             | N       | 2.53                     | 398.4 (11.64%)<br>400.3 (80.37%)<br>405.1 (7.98%)  |
|             | Pd      | 0.94                     | 337                                                |
|             | C       | 83.07                    | 285                                                |
| Pd/CNTs     | O       | 6.66                     | 532                                                |
|             | Pd      | 1.13                     | 335                                                |
|             | C       | 92.22                    | 284                                                |

### S3(2). XPS analysis of Pd/N-CNTs-0

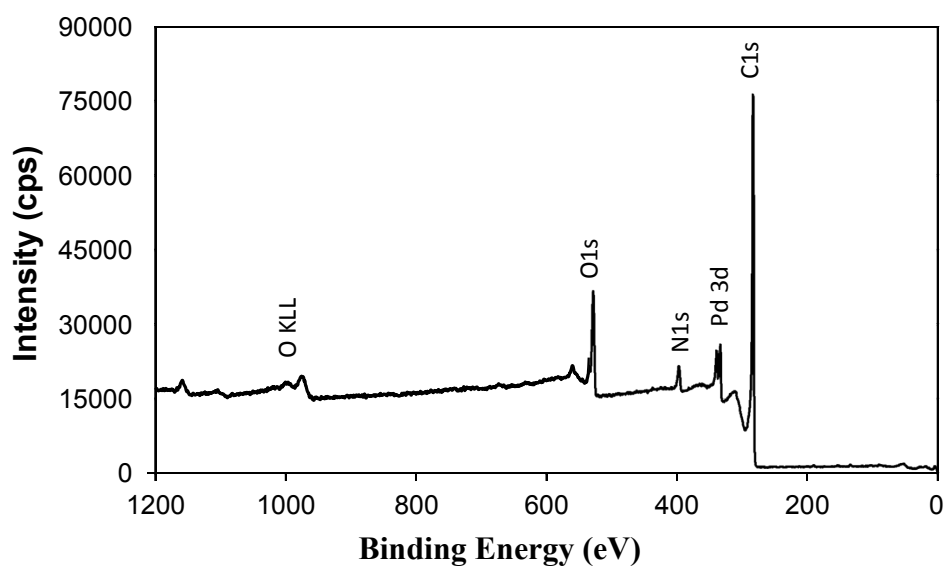

Figure S3 (2a). XPS spectra of Pd/N-CNTs-0

Table S3 (2a). Summary of XPS spectra of Pd/N-CNTs-0

| Peak  | Position BE (eV) | FWHM (eV) | Raw Area (cps eV) | RSF   | Atomic Mass | Atomic Conc % | Mass Conn % |
|-------|------------------|-----------|-------------------|-------|-------------|---------------|-------------|
| C 1s  | 285              | 2.610     | 254430.0          | 0.278 | 12.011      | 83.85         | 73.24       |
| N 1s  | 399              | 4.222     | 23168.0           | 0.477 | 14.007      | 4.36          | 4.44        |
| Pd 3d | 335              | 3.291     | 77012.0           | 5.356 | 106.534     | 1.31          | 10.13       |
| O 1s  | 532              | 4.082     | 92125             | 0.780 | 15.999      | 10.48         | 73.24       |

\*Corresponding author. Telephone: +27-31 260 8256; Fax: +27-31 260 3091

E-mail address: [nyamori@ukzn.ac.za](mailto:nyamori@ukzn.ac.za) (V. O. Nyamori)

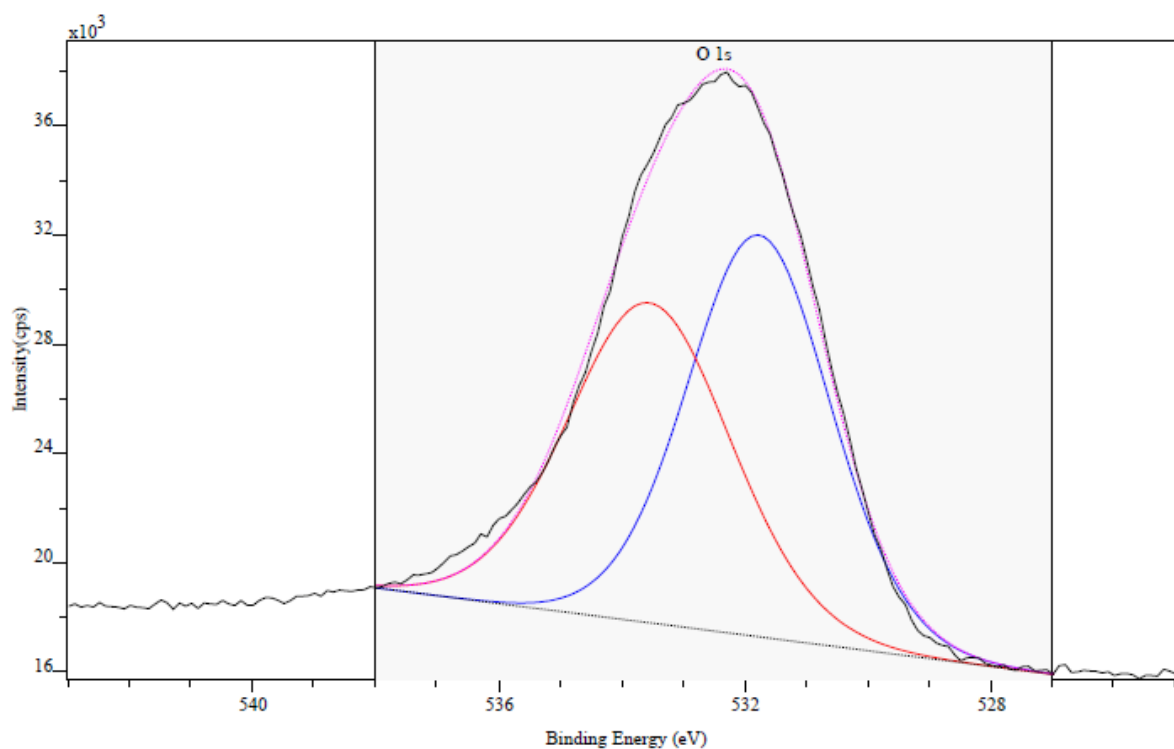

Figure S3 (2b). O 1s spectra of Pd/N-CNTs-0

Table S3 (2b). Summary of O 1s spectra of Pd/N-CNTs-0

| Band | Position BE (eV) | FWHM (ev) | Raw Area (cps eV) | RSF   | Atomic Mass | Atomic Conc % | Mass Conc % |
|------|------------------|-----------|-------------------|-------|-------------|---------------|-------------|
| 1    | 531.883          | 2.817     | 44351.3           | 0.780 | 15.999      | 53.03         | 53.03       |
| 2    | 533.520          | 3.322     | 39294.8           | 0.780 | 15.999      | 46.97         | 46.97       |



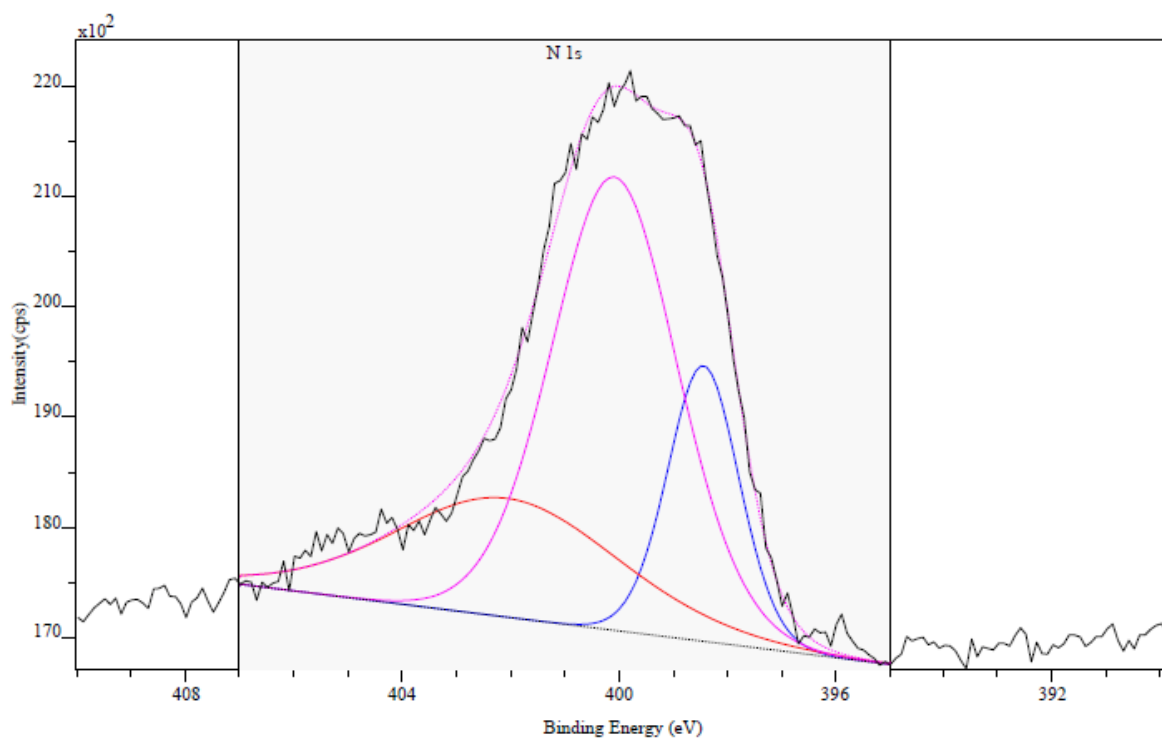

Figure S3 (2c). N 1s spectra of Pd/N-CNTs-0

Table S3 (2c). Summary of N 1s spectra of Pd/N-CNTs-0

| Band | Position BE (eV) | FWHM (ev) | Raw Area (cps eV) | RSF   | Atomic Mass | Atomic Conc % | Mass Conc % |
|------|------------------|-----------|-------------------|-------|-------------|---------------|-------------|
| 1    | 398.512          | 1.687     | 5031.7            | 0.477 | 14.007      | 21.43         | 21.43       |
| 2    | 404.059          | 4.149     | 3636.6            | 0.477 | 14.007      | 15.49         | 15.49       |
| 3    | 400.291          | 2.898     | 14809.6           | 0.477 | 14.007      | 63.08         | 63.08       |

\*Corresponding author. Telephone: +27-31 260 8256; Fax: +27-31 260 3091

E-mail address: [nyamori@ukzn.ac.za](mailto:nyamori@ukzn.ac.za) (V. O. Nyamori)

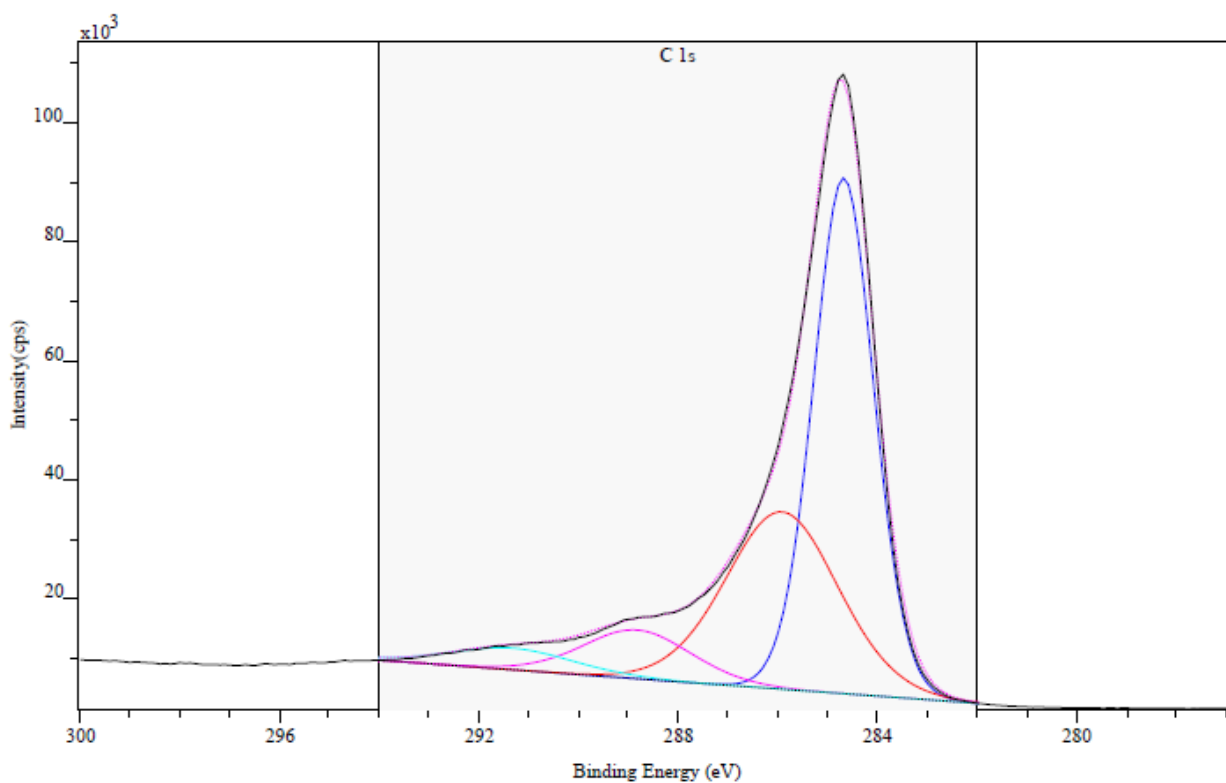

Figure S3 (2d). C 1s spectra of Pd/N-CNTs-0

Table S3 (2d). Summary of C 1s spectra of Pd/N-CNTs-0

| Band | Position BE (eV) | FWHM (ev) | Raw Area (cps eV) | RSF   | Atomic Mass | Atomic Conc % | Mass Conc % |
|------|------------------|-----------|-------------------|-------|-------------|---------------|-------------|
| 1    | 284.683          | 1.400     | 133171.5          | 0.278 | 12.011      | 52.74         | 52.74       |
| 2    | 285.939          | 2.606     | 85347.5           | 0.278 | 12.011      | 33.81         | 33.81       |
| 3    | 288.826          | 2.510     | 22557.5           | 0.278 | 12.011      | 8.94          | 8.94        |
| 4    | 291.336          | 2.860     | 11371.4           | 0.278 | 12.011      | 4.51          | 4.51        |

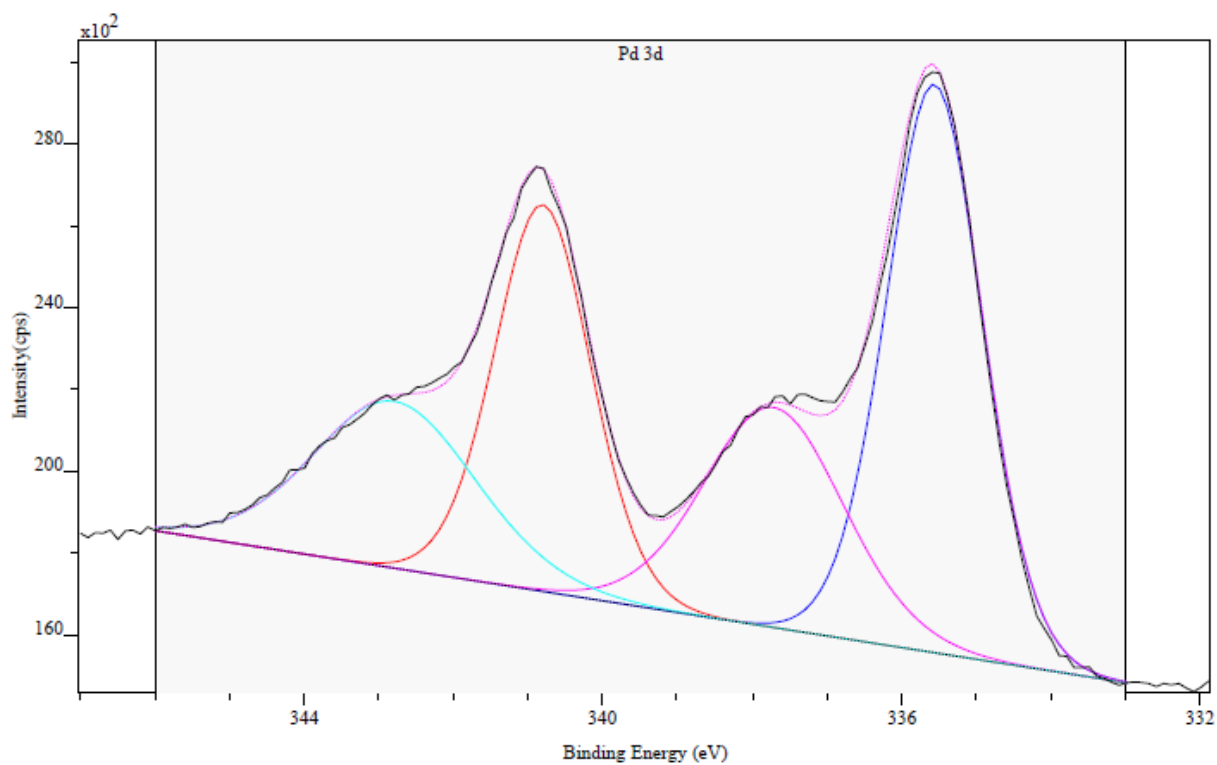

Figure S3 (2e). Pd 3d spectra of Pd/N-CNTs-0

Table S3 (2e). Summary of Pd 3d spectra of Pd/N-CNTs-0

| Band | Position BE (eV) | FWHM (eV) | Raw Area (cps eV) | RSF   | Atomic Mass | Atomic Conc % | Mass Conc % |
|------|------------------|-----------|-------------------|-------|-------------|---------------|-------------|
| 1    | 335.555          | 1.500     | 22918.0           | 5.356 | 106.534     | 36.53         | 36.53       |
| 2    | 340.796          | 1.500     | 15600.5           | 5.356 | 106.534     | 24.83         | 24.83       |
| 3    | 337.746          | 2.178     | 12918.9           | 5.356 | 106.534     | 20.58         | 20.58       |
| 4    | 342.795          | 2.532     | 11353.2           | 5.356 | 106.534     | 18.06         | 18.06       |

\*Corresponding author. Telephone: +27-31 260 8256; Fax: +27-31 260 3091

E-mail address: [nyamori@ukzn.ac.za](mailto:nyamori@ukzn.ac.za) (V. O. Nyamori)

### S3(3). XPS spectra of Pd/N-CNTs-1

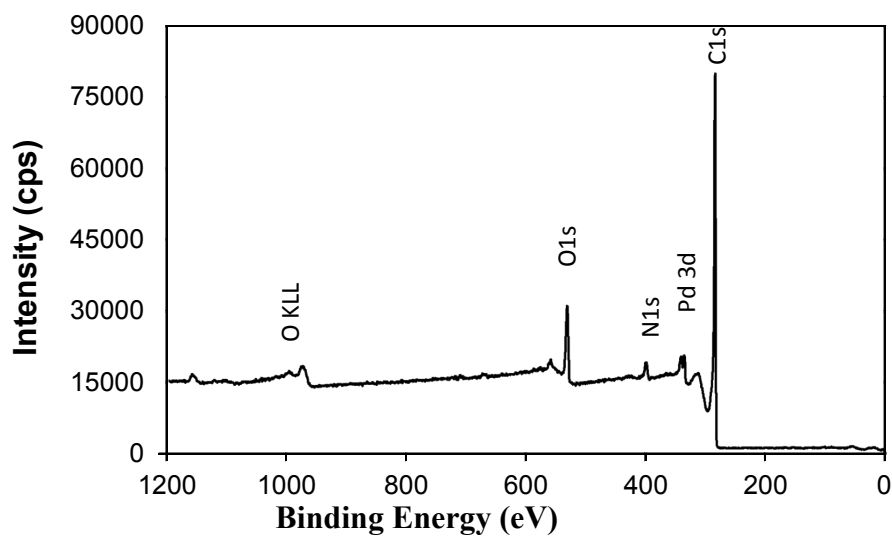

Figure S3 (3a). XPS spectra of Pd/N-CNTs-1

Table S3 (3a). Summary of XPS spectra of Pd/N-CNTs-1

| Peak  | Position BE (eV) | FWHM (eV) | Raw Area (cps eV) | RSF   | Atomic Mass | Atomic Conc % | Mass Conn % |
|-------|------------------|-----------|-------------------|-------|-------------|---------------|-------------|
| C 1s  | 284              | 2.573     | 278652.0          | 0.278 | 12.011      | 87.51         | 80.53       |
| N 1s  | 400              | 4.944     | 19421.0           | 0.477 | 14.007      | 3.48          | 3.74        |
| Pd 3d | 336              | 4.460     | 41703.0           | 5.356 | 106.534     | 0.67          | 5.51        |
| O 1s  | 532              | 4.646     | 76876.0           | 0.780 | 15.999      | 8.34          | 10.22       |

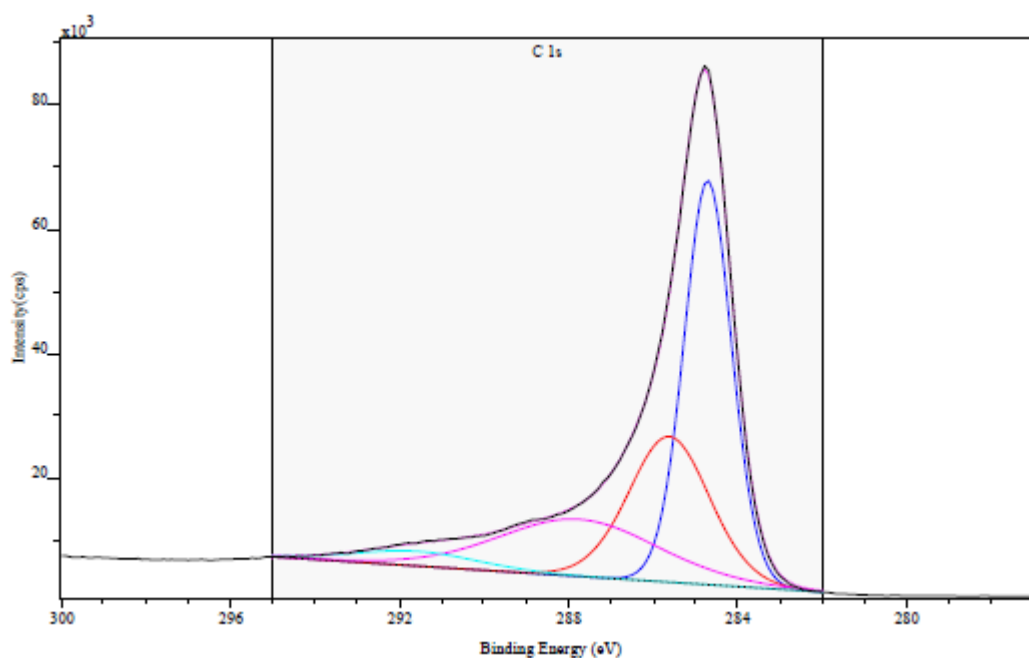

Figure S3 (3b). C 1s spectra of Pd/N-CNTs-1

Table S3 (3b). Summary of C 1s spectra of Pd/N-CNTs-1

| Band | Position BE (eV) | FWHM (ev) | Raw Area (cps eV) | RSF   | Atomic Mass | Atomic Conc % | Mass Conc % |
|------|------------------|-----------|-------------------|-------|-------------|---------------|-------------|
| 1    | 284.743          | 1.297     | 92897.4           | 0.278 | 12.011      | 45.87         | 45.87       |
| 2    | 285.625          | 2.213     | 56818.4           | 0.278 | 12.011      | 28.06         | 28.06       |
| 3    | 287.777          | 4.371     | 43967.5           | 0.278 | 12.011      | 21.73         | 21.73       |
| 4    | 291.599          | 3.391     | 8777.8            | 0.278 | 12.011      | 4.34          | 4.34        |

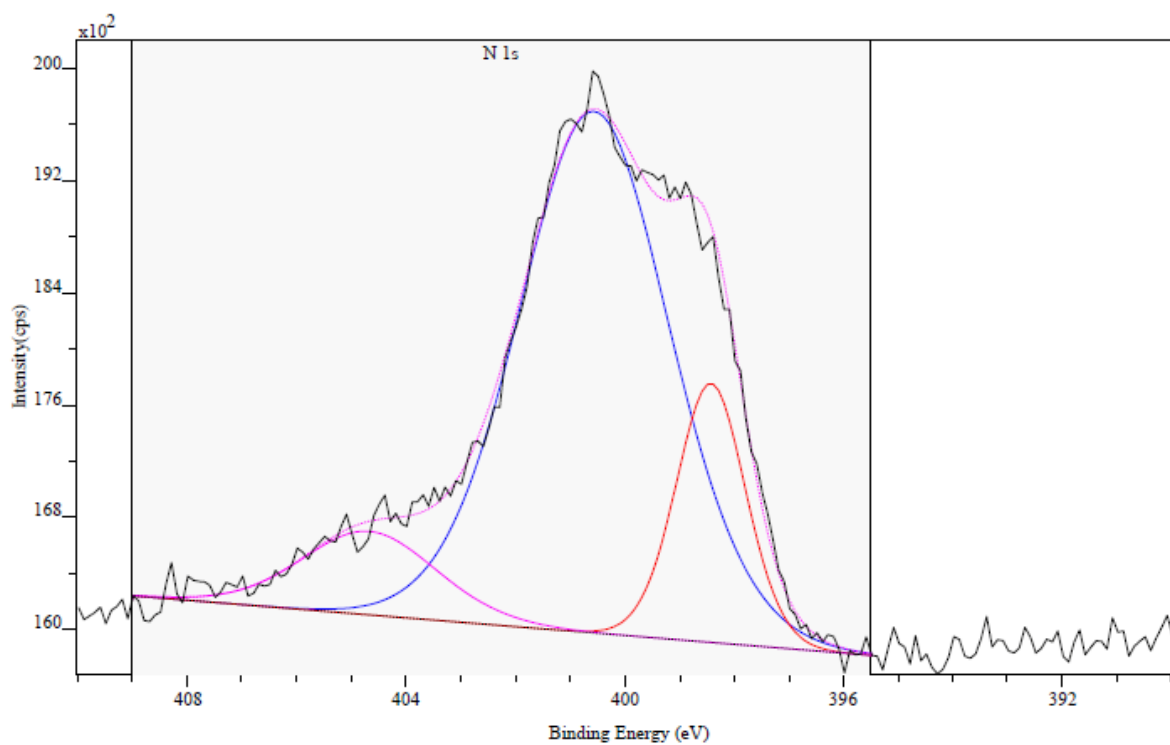

Figure S3 (3c). N 1s spectra of Pd/N-CNTs-1

Table S3 (3c). Summary of N 1s spectra of Pd/N-CNTs-1

| Band | Position BE (eV) | FWHM (ev) | Raw Area (cps eV) | RSF   | Atomic Mass | Atomic Conc % | Mass Conc % |
|------|------------------|-----------|-------------------|-------|-------------|---------------|-------------|
| 1    | 400.595          | 3.182     | 12996.5           | 0.477 | 14.007      | 72.87         | 72.87       |
| 2    | 398.416          | 1.471     | 2974.7            | 0.477 | 14.007      | 16.68         | 16.68       |
| 3    | 404.712          | 2.854     | 1864.9            | 0.477 | 14.007      | 10.46         | 10.46       |

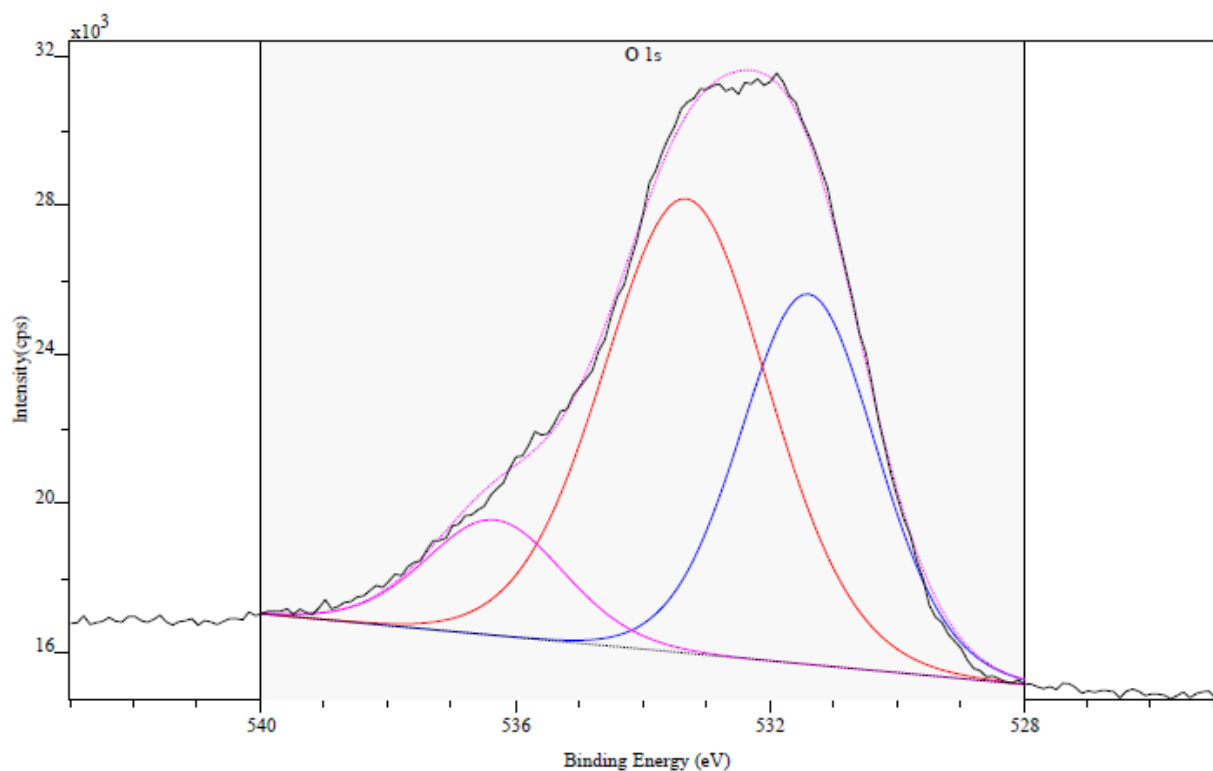

Figure S3 (3d). O 1s spectra of Pd/N-CNTs-1

Table S3 (3d). Summary of O 1s spectra of Pd/N-CNTs-1

| Band | Position BE (eV) | FWHM (ev) | Raw Area (cps eV) | RSF   | Atomic Mass | Atomic Conc % | Mass Conc % |
|------|------------------|-----------|-------------------|-------|-------------|---------------|-------------|
| 1    | 531.393          | 2.487     | 27160.2           | 0.780 | 15.999      | 35.68         | 35.68       |
| 2    | 533.329          | 3.017     | 40417.0           | 0.780 | 15.999      | 53.08         | 53.08       |
| 3    | 536.334          | 2.516     | 8564.2            | 0.780 | 15.999      | 11.24         | 11.24       |

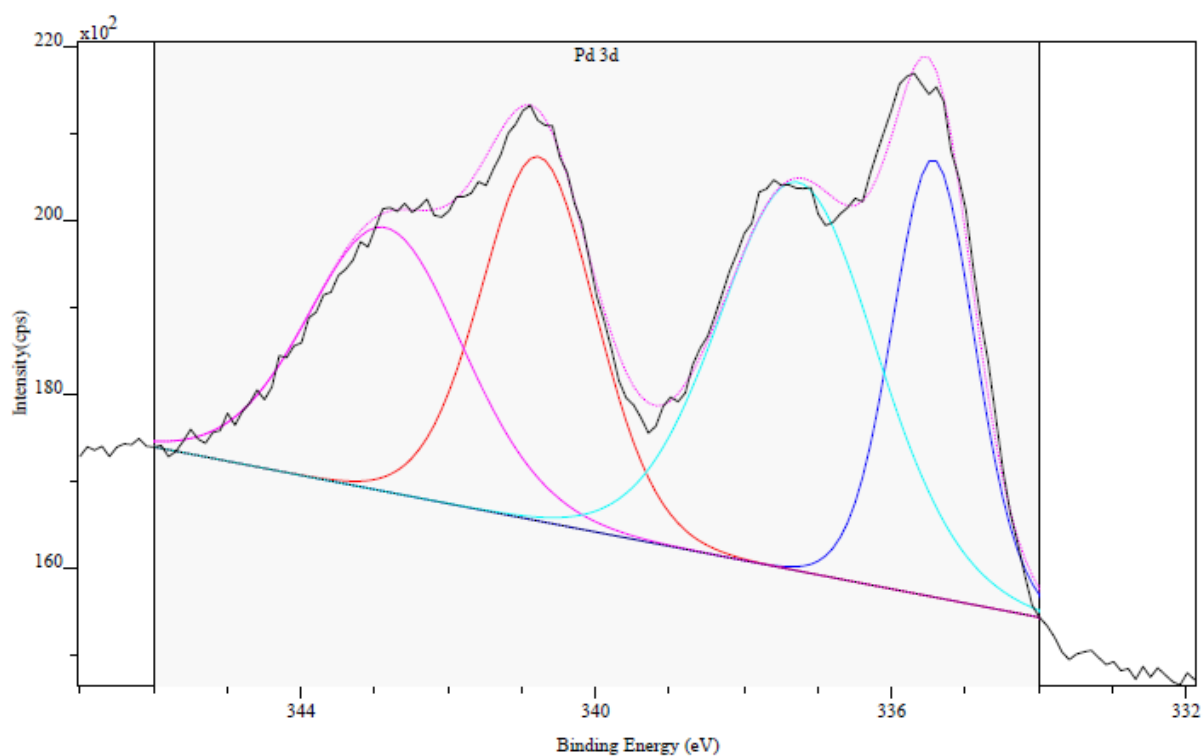

Figure S3 (3e). Pd 3d spectra of Pd/N-CNTs-1

Table S3 (3e). Summary of Pd 3d spectra of Pd/N-CNTs-1

| Band | Position BE (eV) | FWHM (ev) | Raw Area (cps eV) | RSF   | Atomic Mass | Atomic Conc % | Mass Conc % |
|------|------------------|-----------|-------------------|-------|-------------|---------------|-------------|
| 1    | 335.435          | 1.300     | 7198.1            | 5.356 | 106.534     | 20.01         | 20.01       |
| 2    | 340.779          | 1.810     | 8332.6            | 5.356 | 106.534     | 23.13         | 23.13       |
| 3    | 342.848          | 2.458     | 8193.3            | 5.356 | 106.534     | 22.73         | 22.73       |
| 4    | 337.289          | 2.499     | 12289.0           | 5.356 | 106.534     | 34.14         | 34.14       |



### S3(4). XPS spectra of Pd/N-CNTs-2

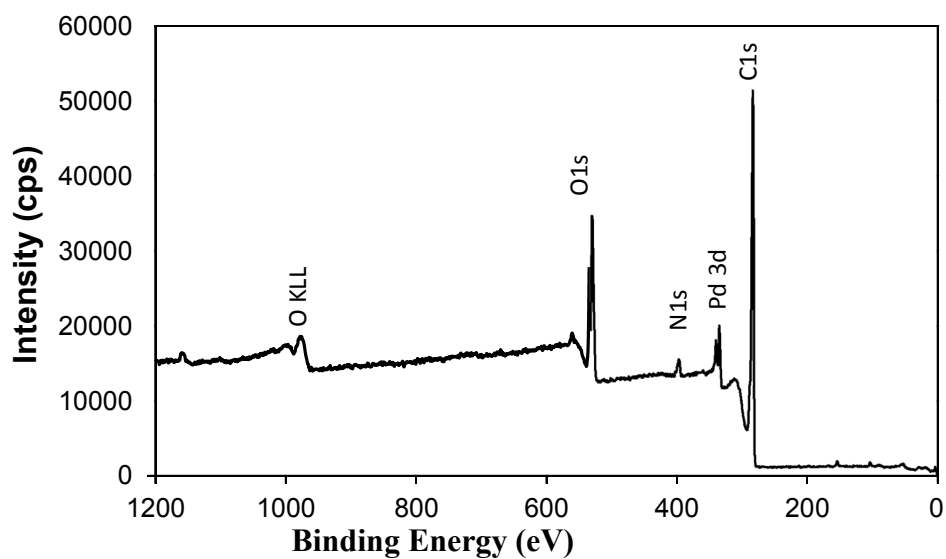

Figure S3 (4a). XPS spectra of Pd/N-CNTs-2

Table S3 (4a). Summary of XPS spectra of Pd/N-CNTs-2

| Peak  | Position BE (eV) | FWHM (eV) | Raw Area (cps eV) | RSF   | Atomic Mass | Atomic Conc % | Mass Conn % |
|-------|------------------|-----------|-------------------|-------|-------------|---------------|-------------|
| C 1s  | 285              | 3.653     | 200690.0          | 0.278 | 12.011      | 83.07         | 73.96       |
| N 1s  | 399              | 4.828     | 10807.0           | 0.477 | 14.007      | 2.53          | 2.62        |
| Pd 3d | 337              | 2.678     | 44772.0           | 5.356 | 106.534     | 0.94          | 7.46        |
| O 1s  | 532              | 4.082     | 92125.0           | 0.780 | 15.999      | 10.48         | 10.22       |

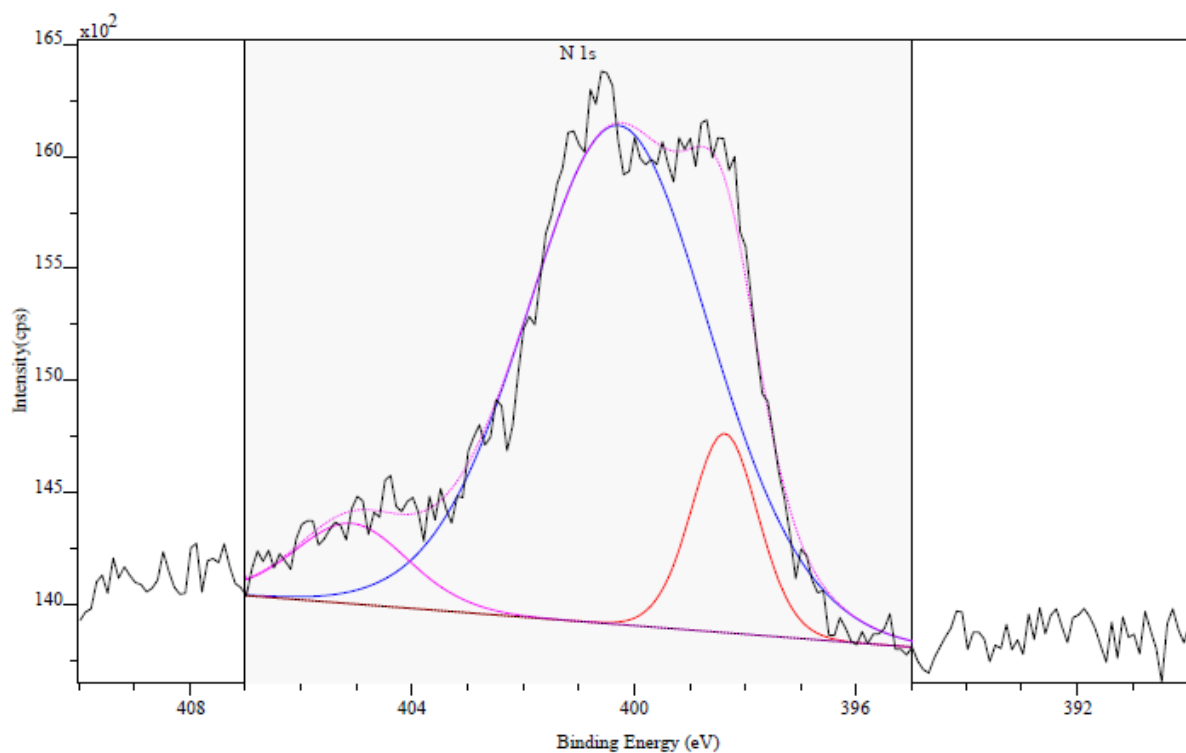

Figure S3 (4b). N 1s spectra of Pd/N-CNTs-2

Table S3 (4b). Summary of N 1s spectra of Pd/N-CNTs-2

| Band | Position BE (eV) | FWHM (ev) | Raw Area (cps eV) | RSF   | Atomic Mass | Atomic Conc % | Mass Conc % |
|------|------------------|-----------|-------------------|-------|-------------|---------------|-------------|
| 1    | 400.312          | 3.859     | 9431.7            | 0.477 | 14.007      | 80.37         | 80.37       |
| 2    | 398.387          | 1.397     | 1366.6            | 0.477 | 14.007      | 11.64         | 11.64       |
| 3    | 405.125          | 2.377     | 936.7             | 0.477 | 14.007      | 7.98          | 7.98        |

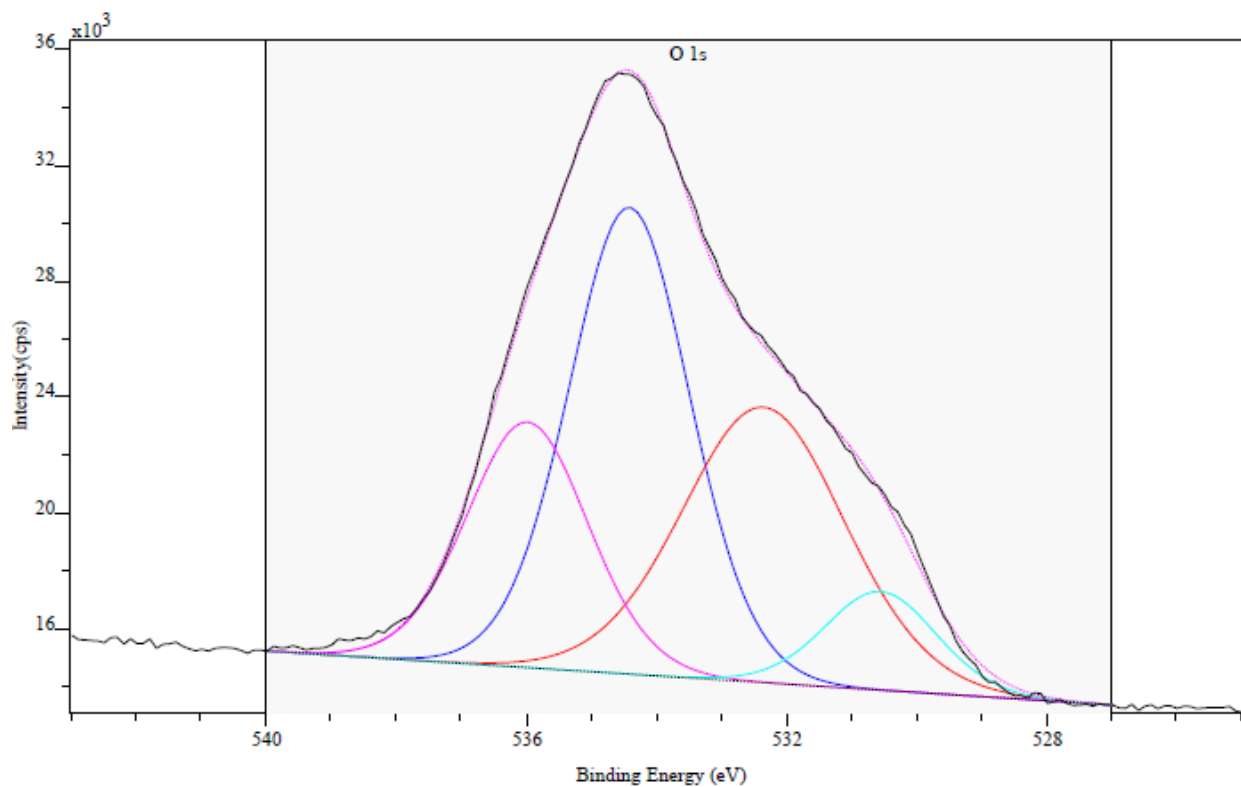

Figure S3 (4c). O 1s spectra of Pd/N-CNTs-2

Table S3 (4c). Summary of O 1s spectra of Pd/N-CNTs-2

| Band | Position BE (eV) | FWHM (eV) | Raw Area (cps eV) | RSF   | Atomic Mass | Atomic Conc % | Mass Conc |
|------|------------------|-----------|-------------------|-------|-------------|---------------|-----------|
| 1    | 534.431          | 2.165     | 38249.0           | 0.780 | 15.999      | 39.77         | 39.77     |
| 2    | 532.370          | 2.911     | 30330.1           | 0.780 | 15.999      | 31.55         | 31.55     |
| 3    | 536.000          | 2.165     | 20134.2           | 0.780 | 15.999      | 20.93         | 20.93     |
| 4    | 530.559          | 2.000     | 7454.0            | 0.780 | 15.999      | 7.75          | 7.75      |

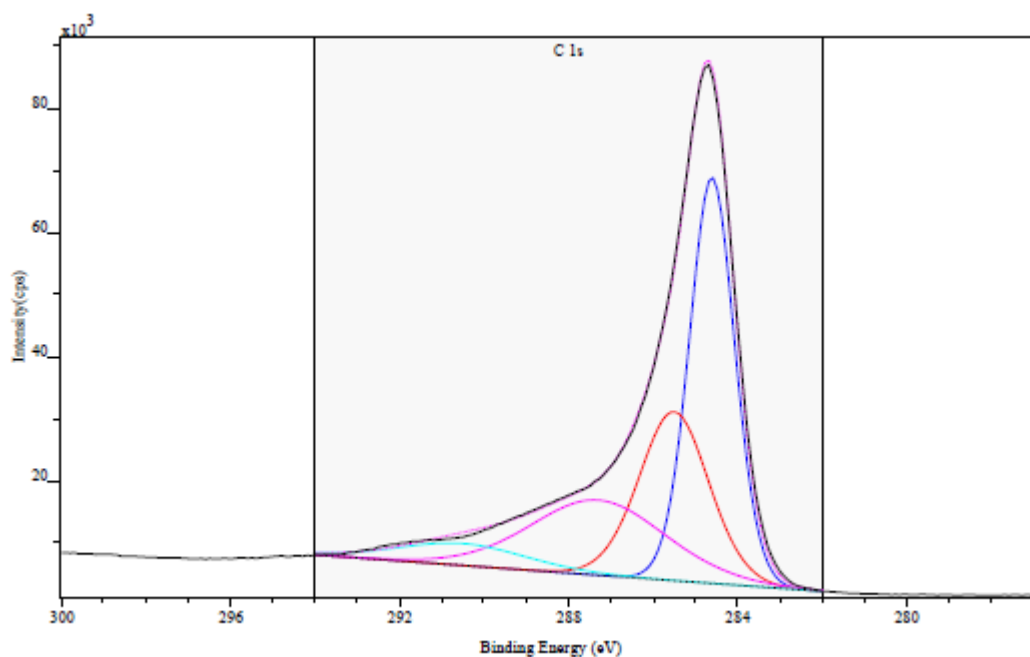

Figure S3 (4d). C 1s spectra of Pd/N-CNTs-2

Table S3 (4d). Summary of C 1s spectra of Pd/N-CNTs-2

| Band | Position BE (eV) | FWHM (eV) | Raw Area (cps eV) | RSF   | Atomic Mass | Atomic Conc % | Mass Conc % |
|------|------------------|-----------|-------------------|-------|-------------|---------------|-------------|
| 1    | 284.626          | 1.231     | 88666.3           | 0.278 | 12.011      | 42.62         | 42.62       |
| 2    | 285.524          | 1.900     | 56800.8           | 0.278 | 12.011      | 27.31         | 27.31       |
| 3    | 287.319          | 3.687     | 48917.9           | 0.278 | 12.011      | 23.53         | 23.53       |
| 4    | 290.561          | 3.500     | 13561.4           | 0.278 | 12.011      | 6.53          | 6.53        |

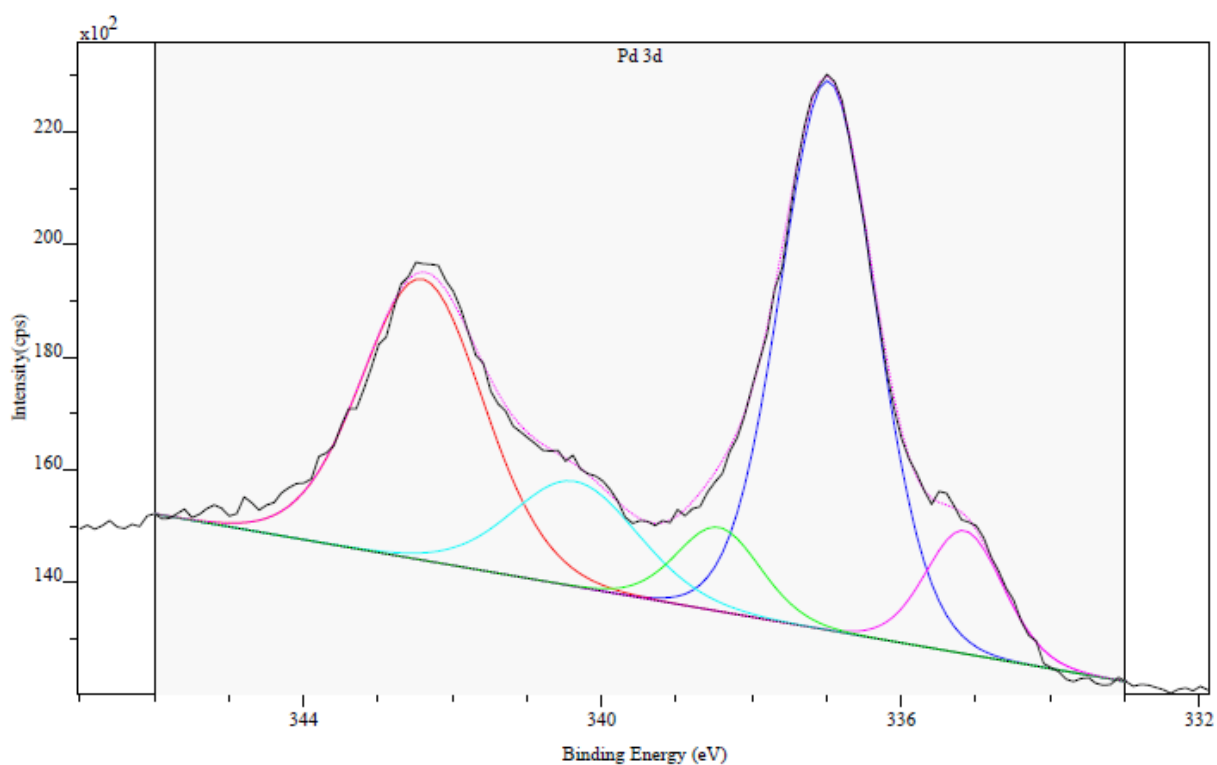

Figure S3 (4e). Pd 3d spectra of Pd/N-CNTs-2

Table S3 (4e). Summary of Pd 3d spectra of Pd/N-CNTs-2

| Band | Position BE (eV) | FWHM (ev) | Raw Area (cps eV) | RSF   | Atomic Mass | Atomic Conc % | Mass Conc % |
|------|------------------|-----------|-------------------|-------|-------------|---------------|-------------|
| 1    | 336.966          | 1.500     | 16093.2           | 5.356 | 106.534     | 45.29         | 45.29       |
| 2    | 342.409          | 1.902     | 10429.3           | 5.356 | 106.534     | 29.30         | 29.30       |
| 3    | 335.166          | 1.200     | 2897.6            | 5.356 | 106.534     | 8.16          | 8.16        |
| 4    | 340.372          | 1.953     | 4010.6            | 5.356 | 106.534     | 11.27         | 11.27       |
| 5    | 338.455          | 1.291     | 2125.9            | 5.356 | 106.534     | 5.98          | 5.98        |

### S3(5). XPS spectra of Pd/CNTs

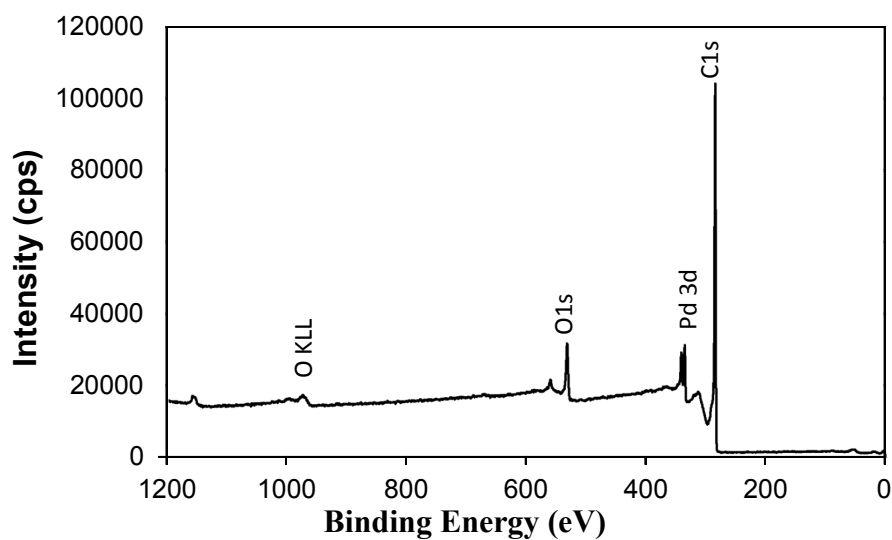

Figure S3 (5a). XPS spectra of Pd/CNTs

Table S3 (5a). Summary of XPS spectra of Pd/CNTs

| Peak  | Position BE (eV) | FWHM (eV) | Raw Area (cps eV) | RSF   | Atomic Mass | Atomic Conc % | Mass Conn % |
|-------|------------------|-----------|-------------------|-------|-------------|---------------|-------------|
| C 1s  | 284              | 2.144     | 293844.0          | 0.278 | 12.011      | 92.22         | 83.03       |
| Pd 3d | 335              | 2.383     | 69642.0           | 5.356 | 106.534     | 1.13          | 8.99        |
| O 1s  | 532              | 3.860     | 61397.0           | 0.780 | 15.999      | 6.66          | 7.98        |

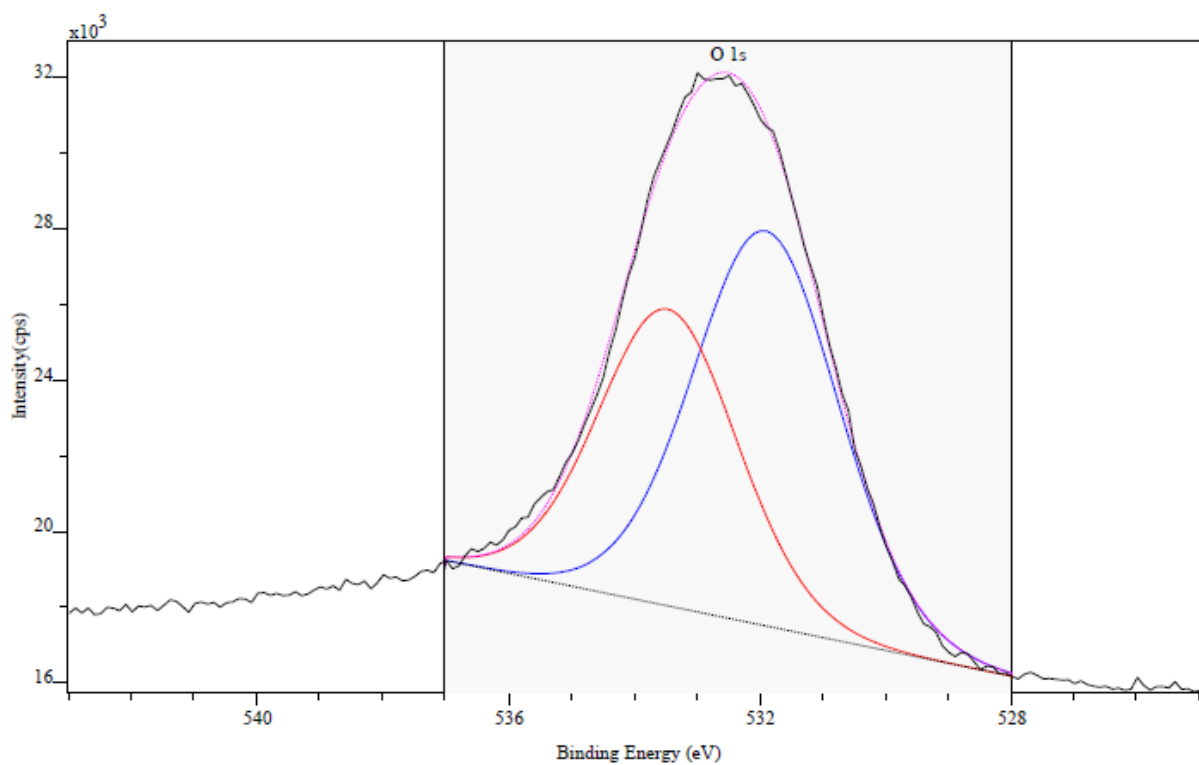

Figure S3 (5b). O 1s spectra of Pd/CNTs

Table S3 (5b). Summary of O 1s spectra of Pd/CNTs

| Band | Position BE (eV) | FWHM (ev) | Raw Area (cps eV) | RSF   | Atomic Mass | Atomic Conc % | Mass Conc % |
|------|------------------|-----------|-------------------|-------|-------------|---------------|-------------|
| 1    | 531.925          | 2.690     | 30860.6           | 0.780 | 15.999      | 58.24         | 58.24       |
| 2    | 533.486          | 2.568     | 22129.1           | 0.780 | 15.999      | 41.76         | 41.76       |

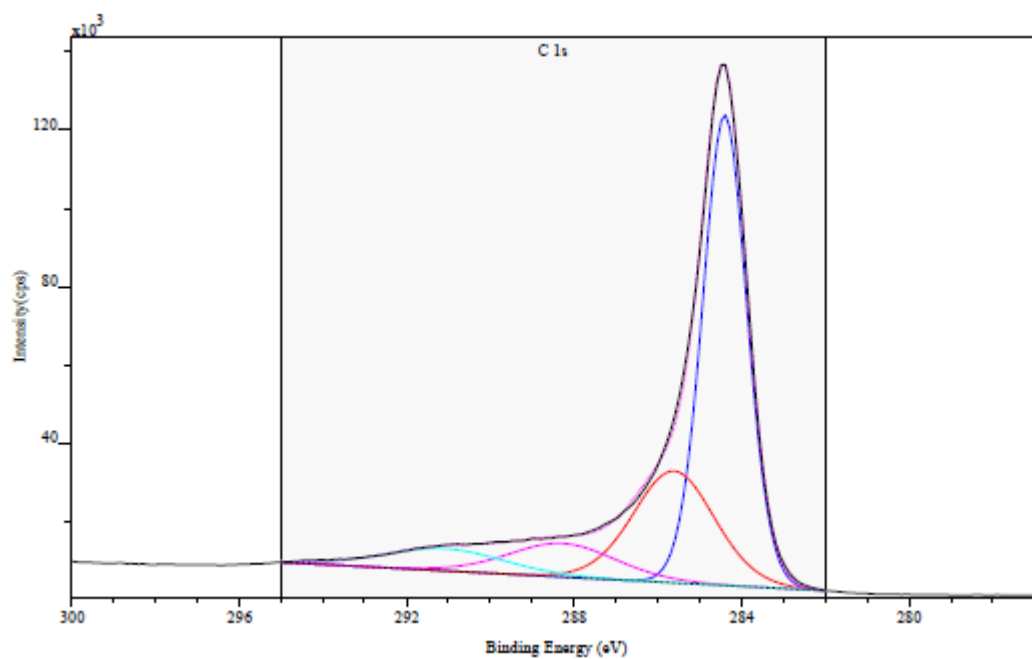

Figure S3 (5c). C 1s spectra of Pd/CNTs

Table S3 (5c). Summary of C 1s spectra of Pd/CNTs

| Band | Position BE (eV) | FWHM (ev) | Raw Area (cps eV) | RSF   | Atomic Mass | Atomic Conc % | Mass Conc % |
|------|------------------|-----------|-------------------|-------|-------------|---------------|-------------|
| 1    | 284.418          | 1.208     | 159796.3          | 0.278 | 12.011      | 57.48         | 57.48       |
| 2    | 285.627          | 2.235     | 69976.4           | 0.278 | 12.011      | 25.18         | 25.18       |
| 3    | 288.298          | 2.948     | 27689.2           | 0.278 | 12.011      | 9.97          | 9.97        |
| 4    | 291.105          | 3.301     | 20465.8           | 0.278 | 12.011      | 7.37          | 7.37        |



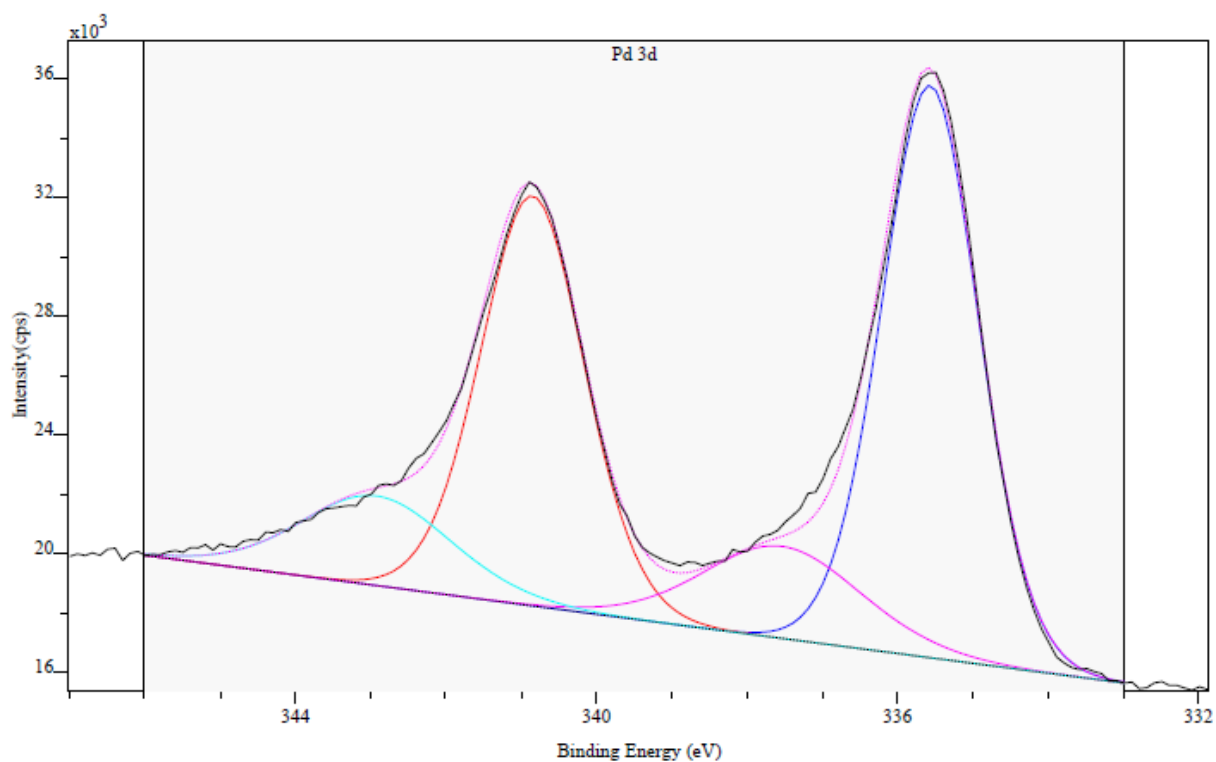

Figure S3 (5d). Pd 3d spectra of Pd/CNTs

Table S3 (5d). Summary of Pd 3d spectra of Pd/CNTs

| Band | Position BE (eV) | FWHM (eV) | Raw Area (cps eV) | RSF   | Atomic Mass | Atomic Conc % | Mass Conc % |
|------|------------------|-----------|-------------------|-------|-------------|---------------|-------------|
| 1    | 335.561          | 1.500     | 31746.3           | 5.356 | 106.534     | 44.11         | 44.11       |
| 2    | 340.882          | 1.600     | 24318.1           | 5.356 | 106.534     | 33.74         | 33.74       |
| 3    | 337.564          | 2.437     | 8300.4            | 5.356 | 106.534     | 11.53         | 11.53       |
| 4    | 342.957          | 2.307     | 7658.1            | 5.356 | 106.534     | 10.62         | 10.62       |

## Supplementary Information S4

### O 1s analysis

The O 1s spectra of N-CNTs and CNTs exhibited broad peaks between 531-536 eV as depicted in Figure S4 (1). Deconvolution of these broad peaks revealed that N-CNTs-1 and N-CNTs-2 had an extra peak at 536.0-536.3 eV coded as O1, which was assigned to oxygen present in esters (Supplementary Information S3). Increase in the quantity of C3 directly correlated with the increase of O1 (Table 1). Since both species were only present in N-CNTs-1 and N-CNTs-2, it is possible that they originated from the same compound present in N-CNTs-1 and N-CNTs-2 alone. This compound was possibly a lactone because, C3 was assigned to carbonyls in quinones, lactones or ketones and O1 was ascribed to oxygen in esters. Lactones have been known to be introduced into N-CNTs and CNTs by acid treatment with nitric acid.<sup>32</sup> However, in this case, a similar procedure was used in the acid treatment of all supports; therefore, the possibility of introducing lactone groups in N-CNTs-1 and N-CNTs-2 by only acid treatment was ruled out. Thus, we propose that the lactones originated from the reaction between oxygen present in ethylbenzoate and hydrocarbons present in the synthesis precursors.

**Table S4 (1).** Summary of C 1s and O 1s XPS spectra of Pd/N-CNTs and Pd/CNTs.

| Sample      | C at.% |      |      |      | O at.%  |      |
|-------------|--------|------|------|------|---------|------|
|             | C1     | C2   | C3   | C4   | O Total | O1   |
| Pd/N-CNTs-0 | 52.7   | 33.8 | -    | 8.9  | 10.4    | -    |
| Pd/N-CNTs-1 | 45.9   | 28.6 | 21.7 | -    | 8.3     | 11.2 |
| Pd/N-CNTs-2 | 42.4   | 27.3 | 23.5 | -    | 13.5    | 20.9 |
| Pd/CNTs     | 57.4   | 25.1 | -    | 10.0 | 6.6     | -    |

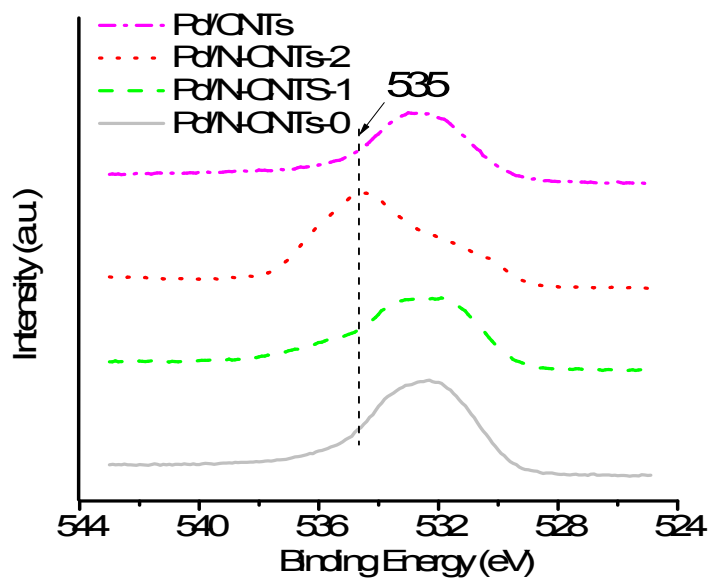

**Figure S4 (1).** O 1s XPS spectra of CNTs and N-CNTs synthesized by using 0-2 wt.% oxygen in acetonitrile.

## N<sub>2</sub>-adsorption-desorption analysis

**Table S4 (2).** Textural properties of as-synthesized and purified supports.

| Support  | SA of as-synthesized support (m <sup>2</sup> g <sup>-1</sup> ) | SA of purified support (m <sup>2</sup> g <sup>-1</sup> ) | Pore size distribution of as-synthesized support (nm) | Pore size distribution of purified support (nm) |
|----------|----------------------------------------------------------------|----------------------------------------------------------|-------------------------------------------------------|-------------------------------------------------|
| CNTs     | 14                                                             | 40                                                       | 2.8                                                   | 4.1                                             |
| N-CNTs-0 | 24                                                             | 38                                                       | 3.8                                                   | 4.5                                             |
| N-CNTs-1 | 14                                                             | 64                                                       | 3.9                                                   | 4.1                                             |
| N-CNTs-2 | 15                                                             | 33                                                       | 3.9                                                   | 4.1                                             |

SA: surface area

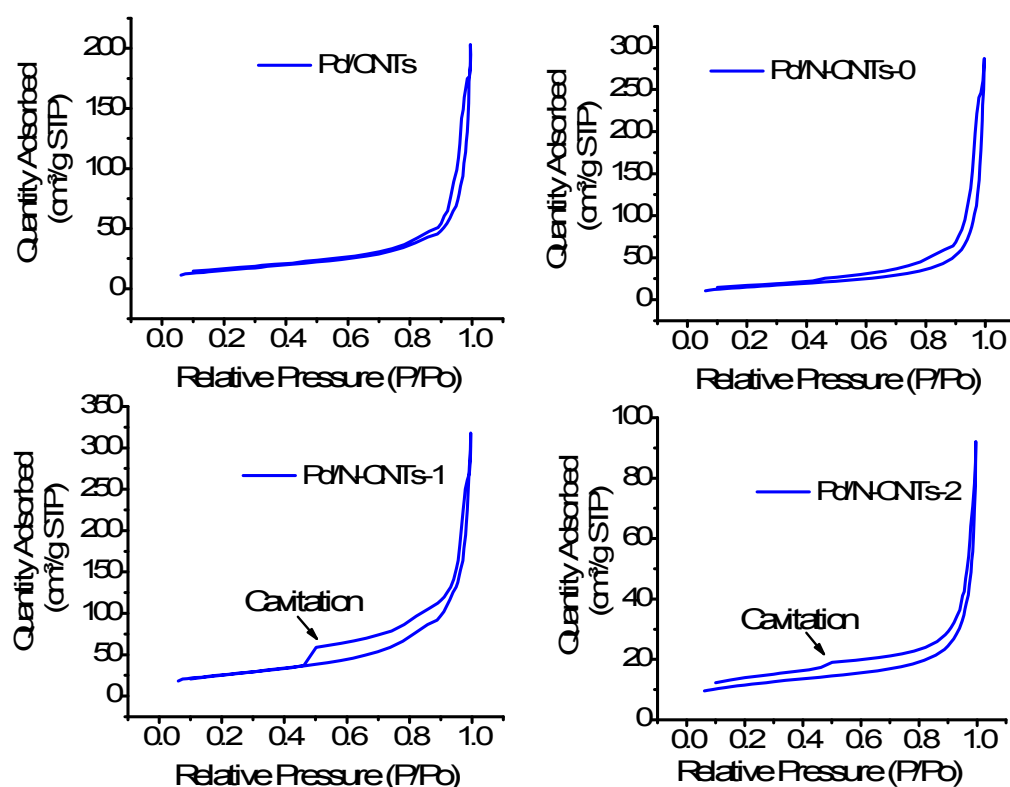

**Figure S4 (2).** N<sub>2</sub> adsorption–desorption isotherms of Pd/CNTs and Pd/N-CNTs.

\*Corresponding author. Telephone: +27-31 260 8256; Fax: +27-31 260 3091

E-mail address: [nyamori@ukzn.ac.za](mailto:nyamori@ukzn.ac.za) (V. O. Nyamori)

### Supplementary Information S5

Table S5(a): The surface area and pore size distribution of Pd/AC.

| Catalyst | Surface area (m <sup>2</sup> g <sup>-1</sup> ) | Pore size distribution (nm) |
|----------|------------------------------------------------|-----------------------------|
| Pd/AC    | 890                                            | 3.9                         |

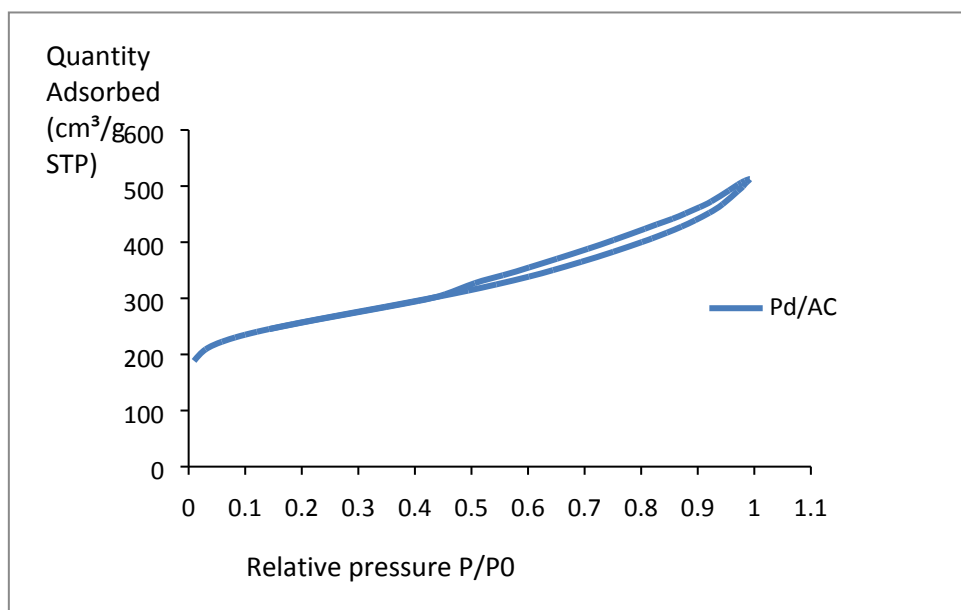

Figure S5 (b): The N<sub>2</sub> adsorption–desorption isotherms of Pd/AC.

## Supplementary Information S6

### TEM analysis of Pd/AC

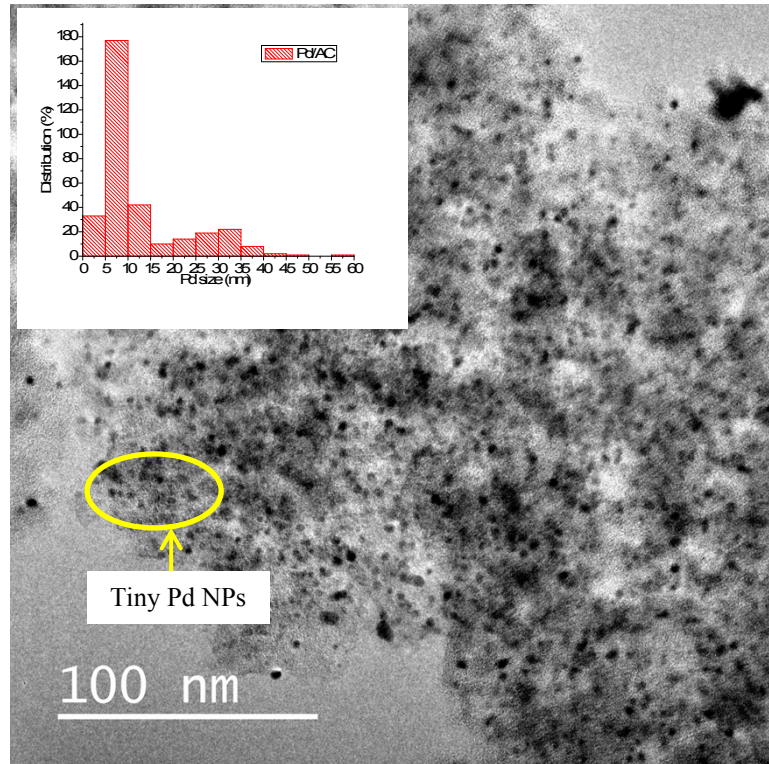

Figure S6 (a): TEM image of Pd/AC.

### Hydrogenation over Pd/AC

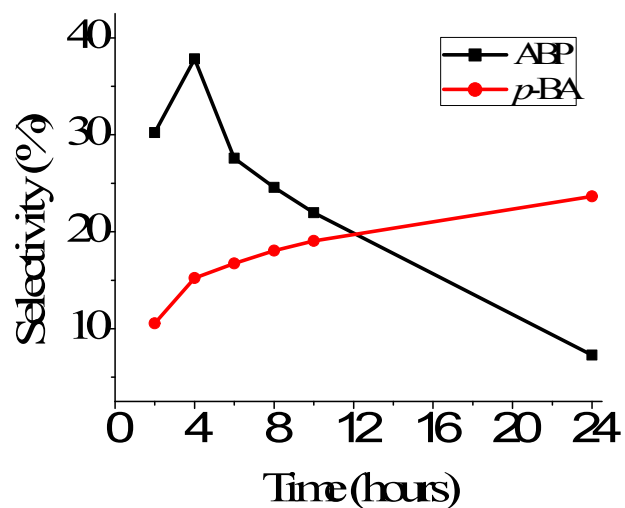

Figure S6 (b): Selectivity towards aminobenzophenone (ABP) and *p*-benzylaniline (*p*-BA) over Pd/AC.

### Supplementary Information S7

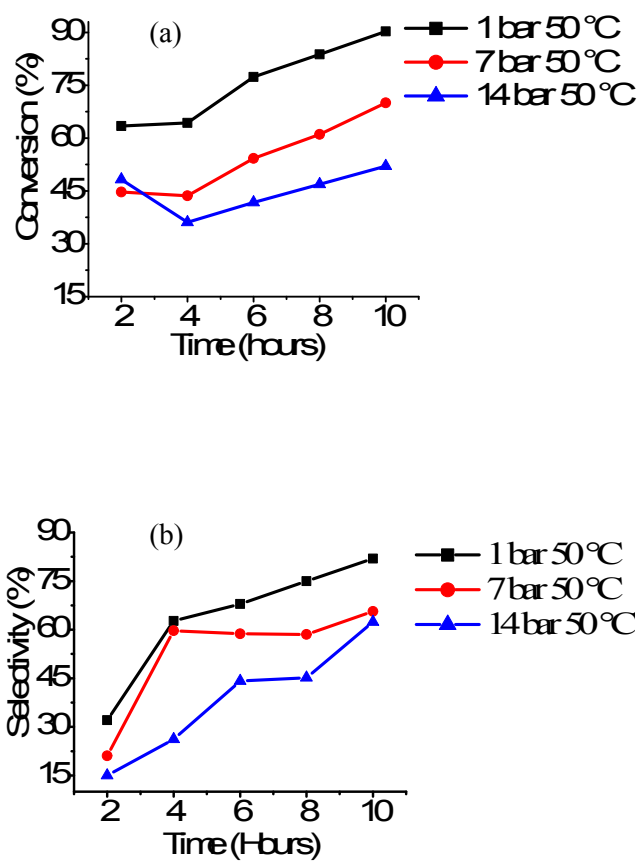

Figure S7. The effect of pressure on (a) catalytic activity of Pd/N-CNTs-2 and (b) selectivity over Pd/N-CNTs-2.



## Supplementary Information S8

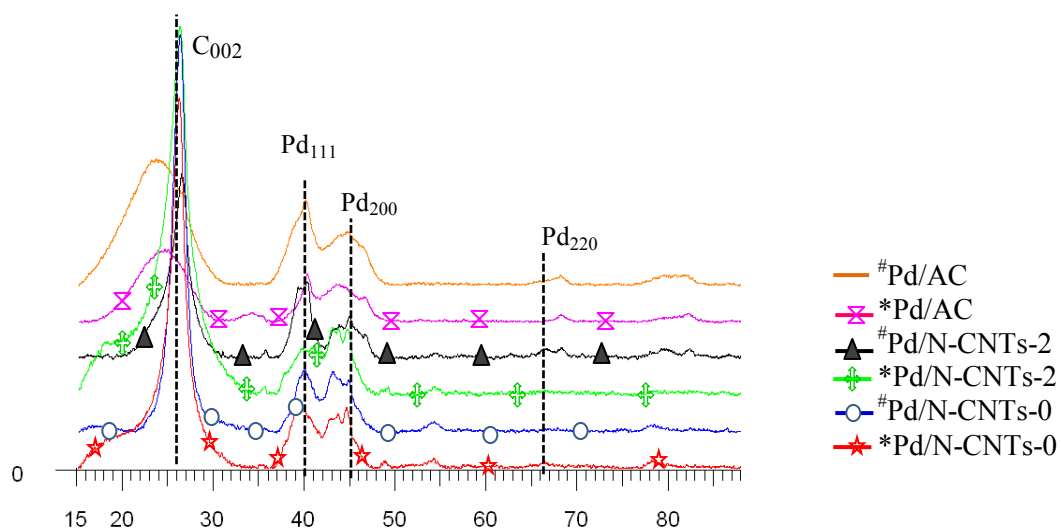

Figure S8. XRD diffractograms of used and unused Pd/AC, Pd/N-CNTs-0 and Pd/N-CNTs-2.

(\*): Fresh catalyst and (#): used catalyst.
